# Supplementary material for: Prediction of ultraviolet optical materials in the K2O–B2O3 system
Source: Royal Society of Chemistry journal article supplement (doi:10.1039/d4cp02424a), 2024-01-01
Supplement: d4cp02424a1.pdf [file d4cp02424a1.pdf]

Electronic Supplementary Material (ESI) for Physical Chemistry Chemical Physics.

**Supplementary Information (SI) for  
Prediction of ultraviolet optical materials in  
the  $K_2O-B_2O_3$  system**

Xiaoqing Guo, ‡ Yanting Wang, ‡ Haiyang Niu\*

State Key Laboratory of Solidification Processing, International Center for Materials  
Discovery, School of Materials Science and Engineering, Northwestern Polytechnical  
University, Xi'an 710072, P.R. China

‡ These authors contributed equally to the work

\*Corresponding Author: [haiyang.niu@nwpu.edu.cn](mailto:haiyang.niu@nwpu.edu.cn)

## Supplementary Discussion

### Impact of temperature and pressure on phase stability.

As demonstrated by many precious studies, temperature has been found to play an important role in stabilizing structures that are metastable at 0 K. For instance, *oP112-1-KB<sub>5</sub>O<sub>8</sub>* is stable at 0 K <sup>[1]</sup>, while *oP112-2-KB<sub>5</sub>O<sub>8</sub>* is a metastable phase at 0 K. Previous experimental research has shown that *oP112-2-KB<sub>5</sub>O<sub>8</sub>* can be synthesized at 760 °C, indicating its stability as a high-temperature phase <sup>[1]</sup>. Thus, for the newly predicted structures, particularly those that are metastable, synthesizing at elevated temperature presents a promising approach to realizing them in practice.

To clarify the impact of pressure on the stability of these structures, we have further calculated the thermodynamic convex hull at 3 GPa (Fig. S1). The metastable structures observed at 0 GPa, namely *mP28-2-K<sub>3</sub>BO<sub>3</sub>*, *mC72-KB<sub>3</sub>O<sub>5</sub>*, *oP112-2-KB<sub>5</sub>O<sub>8</sub>*, become thermodynamically stable at 3 GPa, suggesting that pressure enhances the stability of these structures. Notably, *mC72-KB<sub>3</sub>O<sub>5</sub>* has been successfully synthesized at 3 GPa and 600 °C in experiments and is recognized as a high-pressure phase in the literature <sup>[2-3]</sup>, underscoring the reliability of our results. Therefore, considering the effects of temperature and pressure on phase stability, it is plausible that metastable phases in the K<sub>2</sub>O-B<sub>2</sub>O<sub>3</sub> system could be synthesized experimentally.

### Nonlinear optical response.

The general expression for the nonlinear optical susceptibility depends on the frequency of  $E(\omega)$ . The second-order susceptibility tensor  $\chi_{ijk}^{(2)}(-2\omega; \omega, \omega)$  is commonly represented as  $\chi_{ijk}^{(2)}(\omega)$ . Since that *hR21-K<sub>3</sub>BO<sub>3</sub>* belongs to the 3m point group, the non-zero components of the susceptibility tensor are:  $\chi_{112}^{(2)}(\omega)$ ,  $\chi_{131}^{(2)}(\omega)$ ,  $\chi_{211}^{(2)}(\omega)$ ,  $\chi_{222}^{(2)}(\omega)$ ,  $\chi_{223}^{(2)}(\omega)$ ,  $\chi_{311}^{(2)}(\omega)$ ,  $\chi_{322}^{(2)}(\omega)$ , and  $\chi_{333}^{(2)}(\omega)$  (1, 2, and 3 refer to the *x*, *y* and *z* axes, respectively). Figs. S5a and S5b illustrate the real and imaginary parts of these eight second-order susceptibility components <sup>[4-5]</sup>. The trends of  $\chi_{112}^{(2)}(\omega)$ ,  $\chi_{311}^{(2)}(\omega)$ ,  $\chi_{322}^{(2)}(\omega)$ , and  $\chi_{223}^{(2)}(\omega)$  are nearly coincident, while  $\chi_{112}^{(2)}(\omega)$  and  $\chi_{211}^{(2)}(\omega)$

exhibit identical trends. Therefore, we have analyzed the intraband and interband contributions to  $\chi_{222}^{(2)}(\omega)$ ,  $\chi_{333}^{(2)}(\omega)$ ,  $\chi_{223}^{(2)}(\omega)$  and  $\chi_{112}^{(2)}(\omega)$  (Figs. S5c-f). Among these,  $\chi_{222}^{(2)}(\omega)$  and  $\chi_{112}^{(2)}(\omega)$  have equal magnitudes but opposite signs, and they are the principal components of SHG.

Within the energy range of 0 to 2.3 eV, the real part changes slowly, and the imaginary part is zero, indicating that  $\chi_{ijk}^{(2)}(\omega)$  is purely dispersive. Importantly, the  $2\omega$  terms dominate in the low energy regions, while high energy states exhibit mixed  $\omega$  and  $2\omega$  terms. This distinction between  $\omega$  and  $2\omega$  patterns highlights the relatively strong birefringence nature of *hR21-K<sub>3</sub>BO<sub>3</sub>*.

In addition, comparing the total contribution with the intraband and interband contributions, we find that the overall value of the second harmonic generation is very small due to the cancellation of intraband and interband components, which have values of opposite signs. Therefore,  $2\omega$  terms start contributing at an energy of  $E_g/2$ , while the  $\omega$  terms begin contributing at energy above  $E_g$ . Consequently, any anisotropy in the linear optical properties is more significantly enhanced in the nonlinear spectra.

## Supplementary Figures

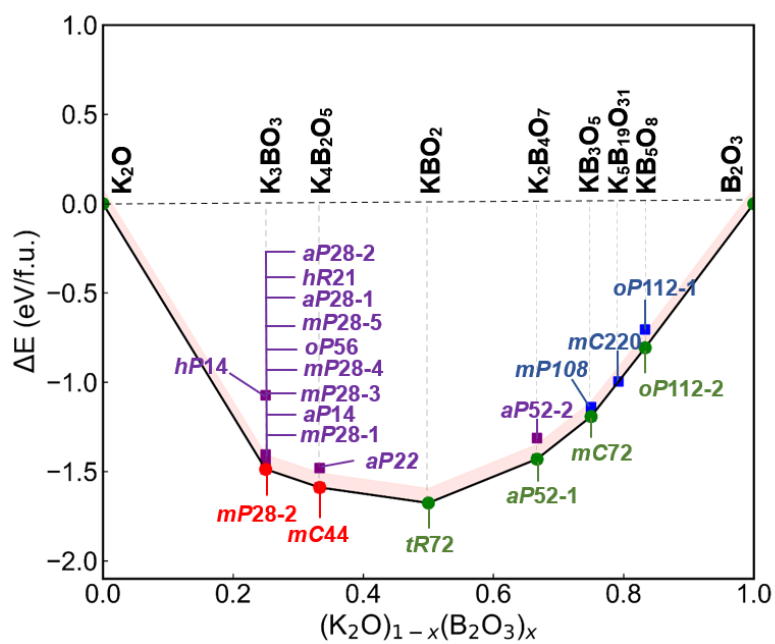

Figure S1. Thermodynamic convex hull of the  $\text{K}_2\text{O}$ - $\text{B}_2\text{O}_3$  system at 0 K and 3 GPa. Thermodynamically stable structures are denoted by red and green dots. Metastable structures are represented by purple and blue squares.

Phonon dispersion curves of *oP56*-K<sub>3</sub>BO<sub>3</sub>

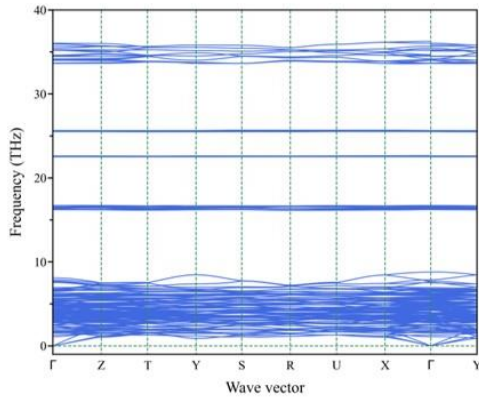

Phonon dispersion curves of *hR21*-K<sub>3</sub>BO<sub>3</sub>

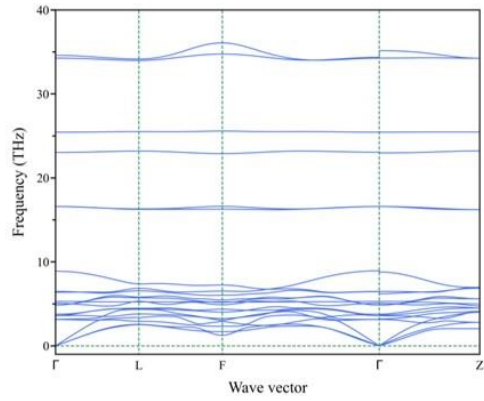

Phonon dispersion curves of *mP28-1*-K<sub>3</sub>BO<sub>3</sub>

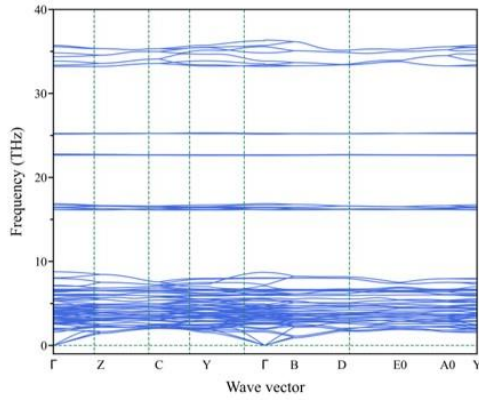

Phonon dispersion curves of *mP28-2*-K<sub>3</sub>BO<sub>3</sub>

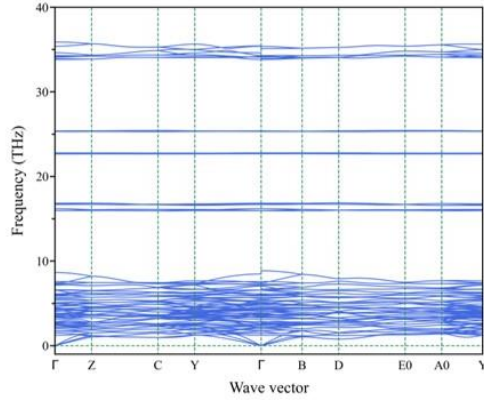

Phonon dispersion curves of *hP14*-K<sub>3</sub>BO<sub>3</sub>

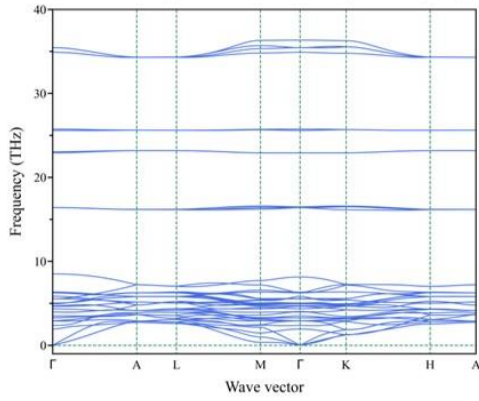

Phonon dispersion curves of *mP28-3*-K<sub>3</sub>BO<sub>3</sub>

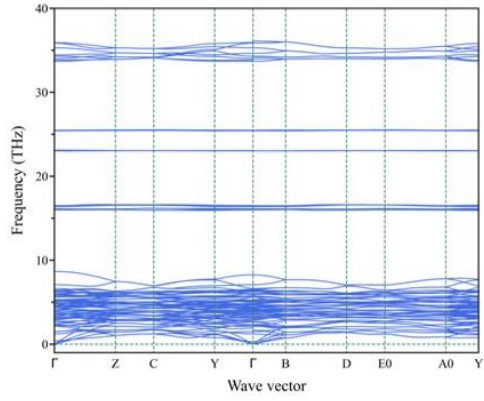

Phonon dispersion curves of *mP28-4*-K<sub>3</sub>BO<sub>3</sub>

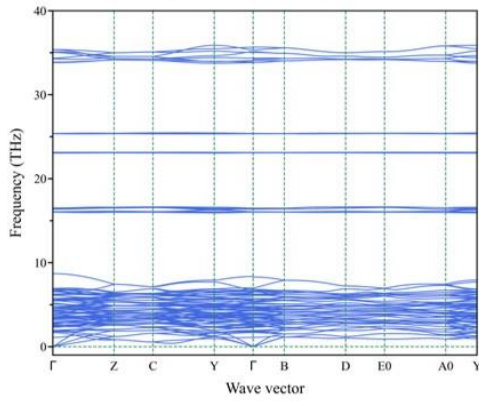

Phonon dispersion curves of *aP14*-K<sub>3</sub>BO<sub>3</sub>

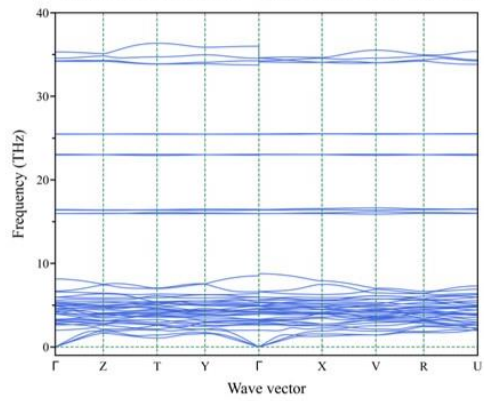

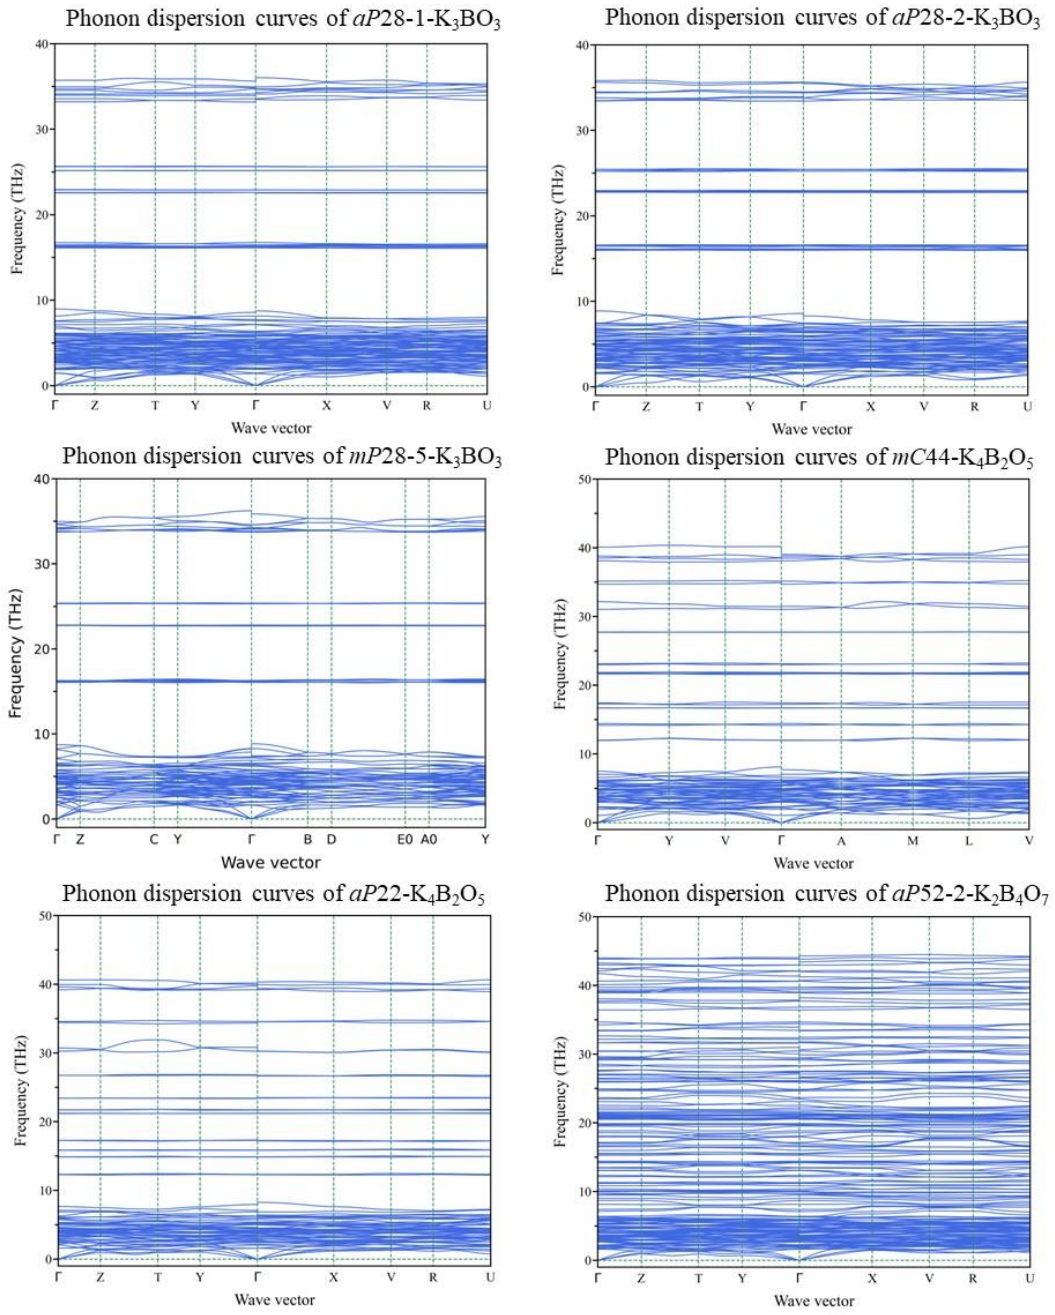

Figure S2. The phonon dispersion curves of fourteen predicted structures.

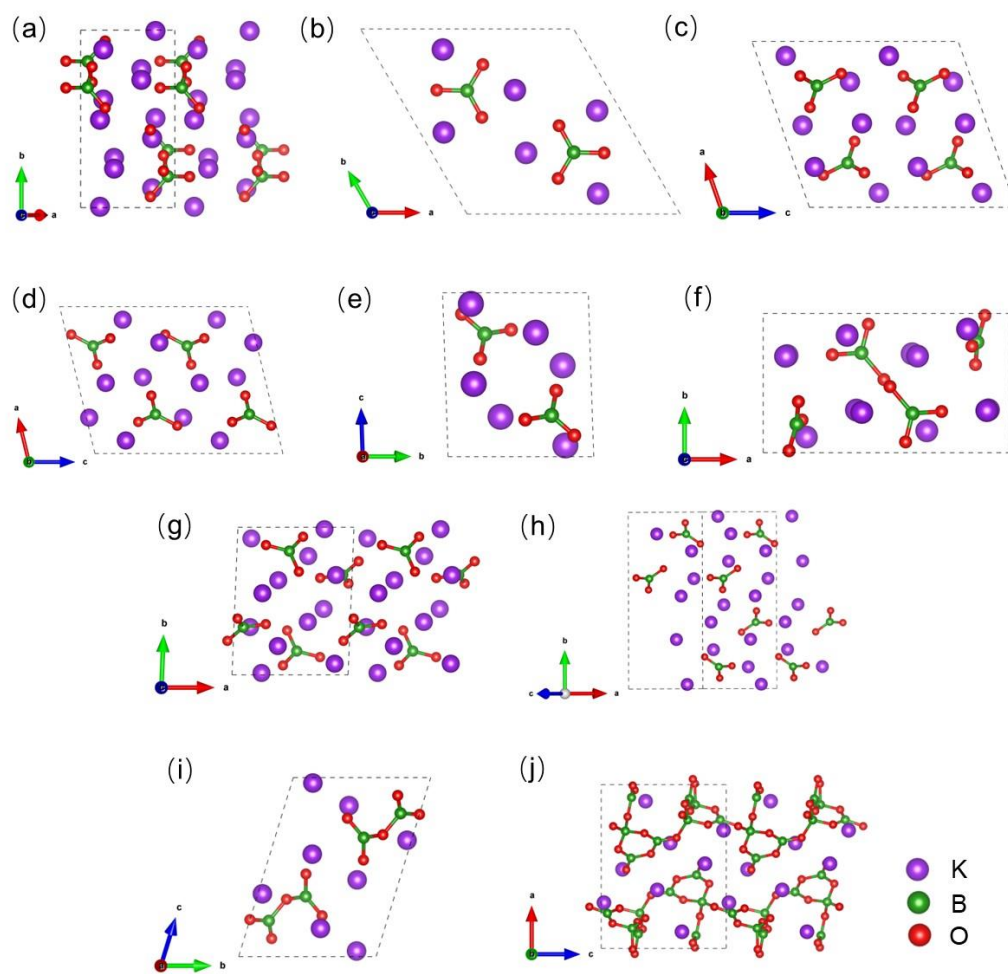

Figure S3. Crystal structures. (a) *mP28-2-K<sub>3</sub>BO<sub>3</sub>*, (b) *hP14-K<sub>3</sub>BO<sub>3</sub>*, (c) *mP28-3-K<sub>3</sub>BO<sub>3</sub>*, (d) *mP28-4-K<sub>3</sub>BO<sub>3</sub>*, (e) *aP14-K<sub>3</sub>BO<sub>3</sub>*, (f) *aP28-1-K<sub>3</sub>BO<sub>3</sub>*, (g) *aP28-2-K<sub>3</sub>BO<sub>3</sub>*, (h) *mP28-5-K<sub>3</sub>BO<sub>3</sub>*, (i) *aP22-K<sub>4</sub>B<sub>2</sub>O<sub>5</sub>*, (j) *aP52-2-K<sub>2</sub>B<sub>4</sub>O<sub>7</sub>*.

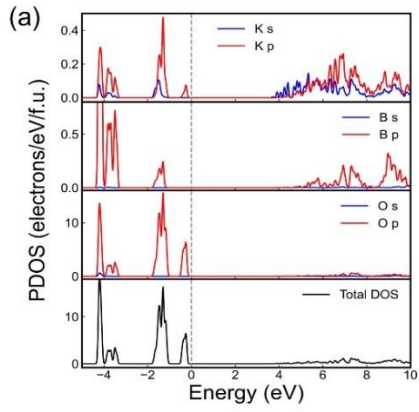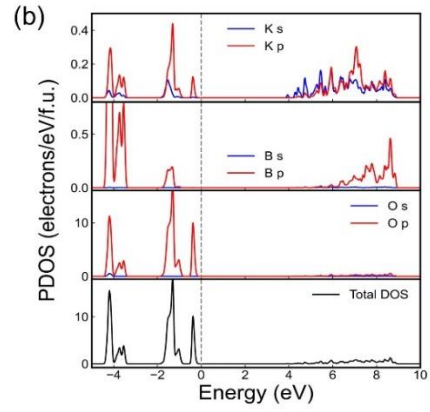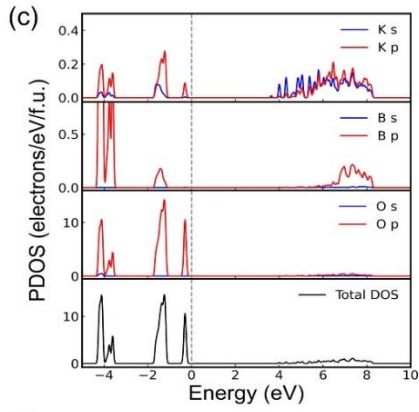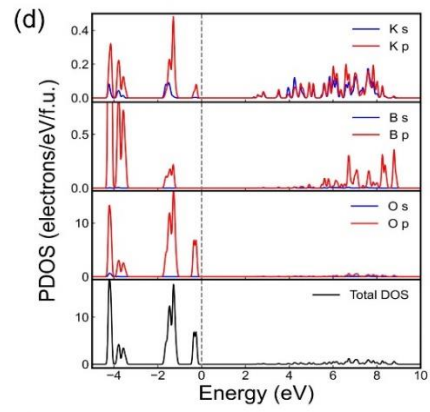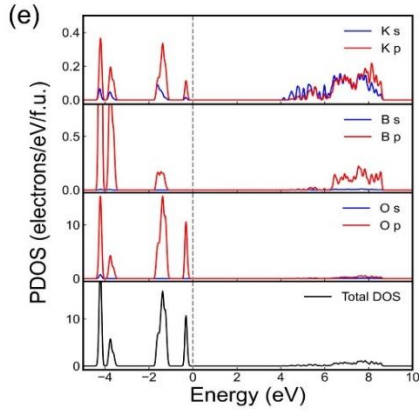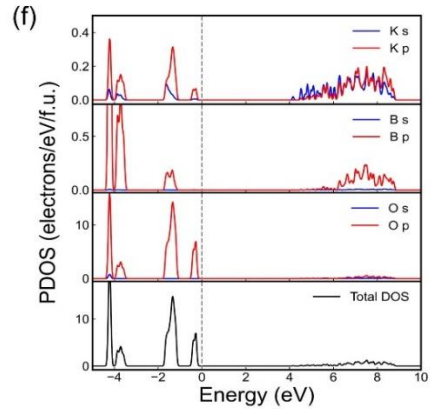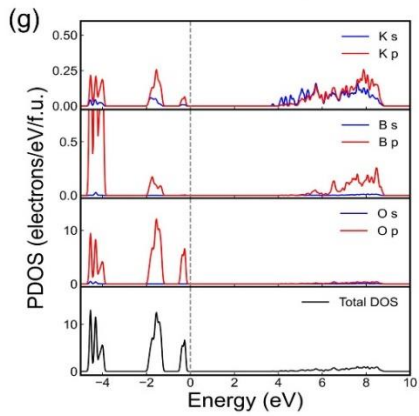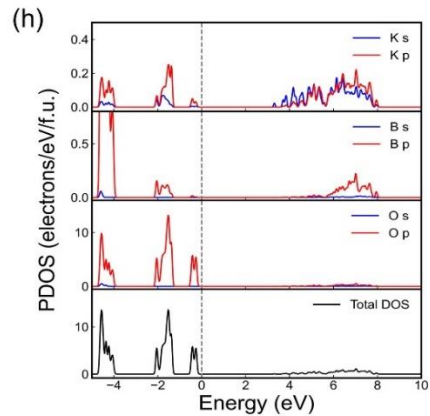



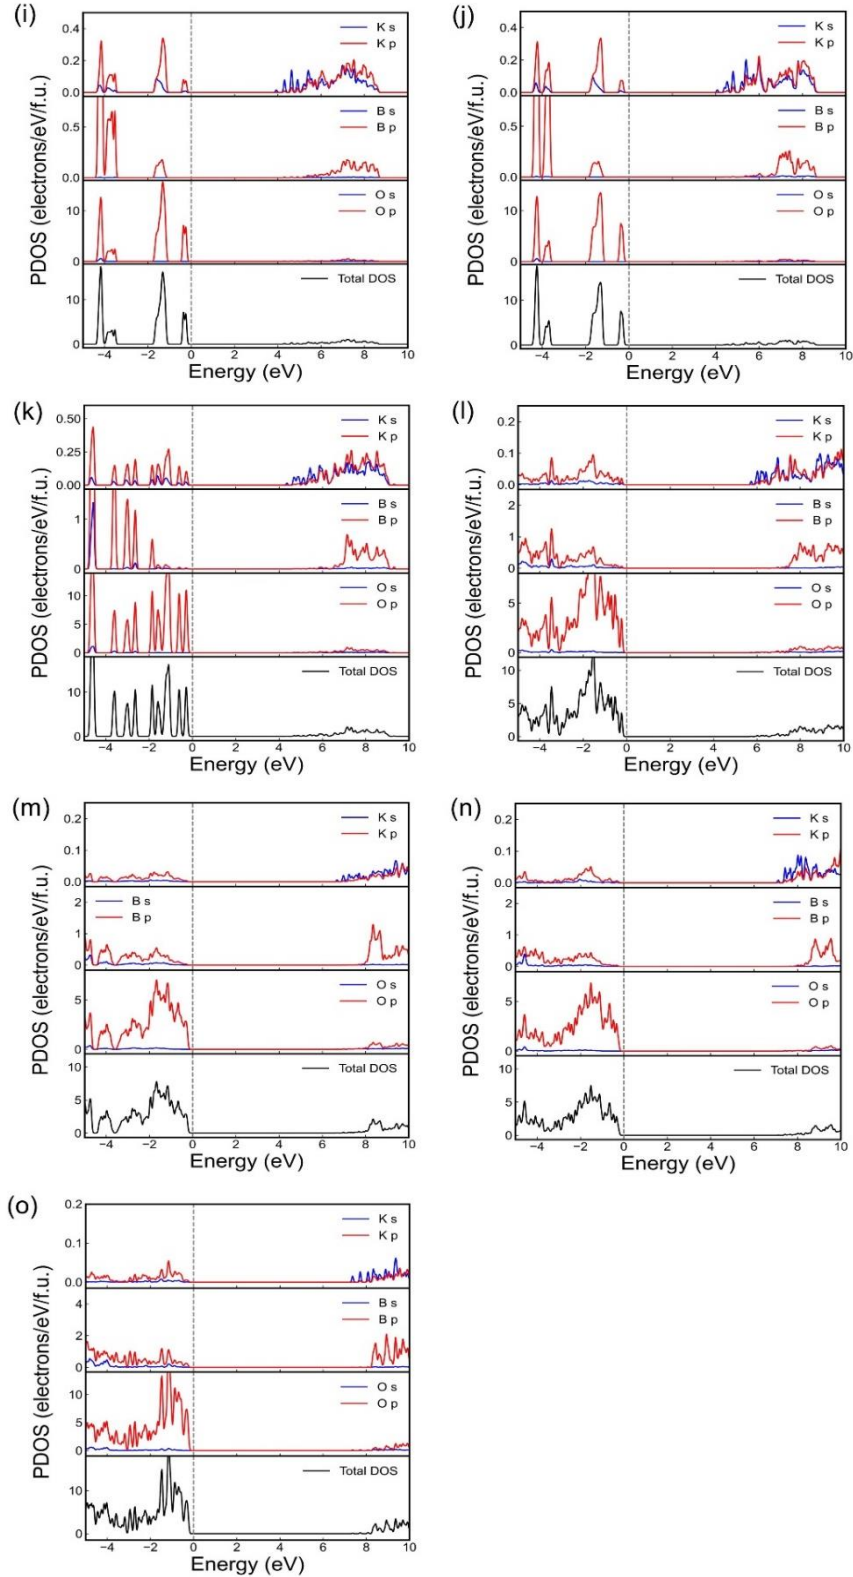

Figure S4. Projected density of states. (a) *hR21-K<sub>3</sub>BO<sub>3</sub>*, (b) *mP28-1-K<sub>3</sub>BO<sub>3</sub>*, (c) *mP28-2-K<sub>3</sub>BO<sub>3</sub>*, (d) *hP14-K<sub>3</sub>BO<sub>3</sub>*, (e) *mP28-3-K<sub>3</sub>BO<sub>3</sub>*, (f) *mP28-4-K<sub>3</sub>BO<sub>3</sub>*, (g) *aP14-K<sub>3</sub>BO<sub>3</sub>*, (h) *aP28-1-K<sub>3</sub>BO<sub>3</sub>*, (i) *aP28-2-K<sub>3</sub>BO<sub>3</sub>*, (j) *mP28-5-K<sub>3</sub>BO<sub>3</sub>*, (k) *aP22-K<sub>4</sub>B<sub>2</sub>O<sub>5</sub>*, (l) *aP52-2-K<sub>2</sub>B<sub>4</sub>O<sub>7</sub>*, (m) *mP108-KB<sub>3</sub>O<sub>5</sub>*, (n) *mC72-KB<sub>3</sub>O<sub>5</sub>*, (o) *oP112-2-KB<sub>5</sub>O<sub>8</sub>*.

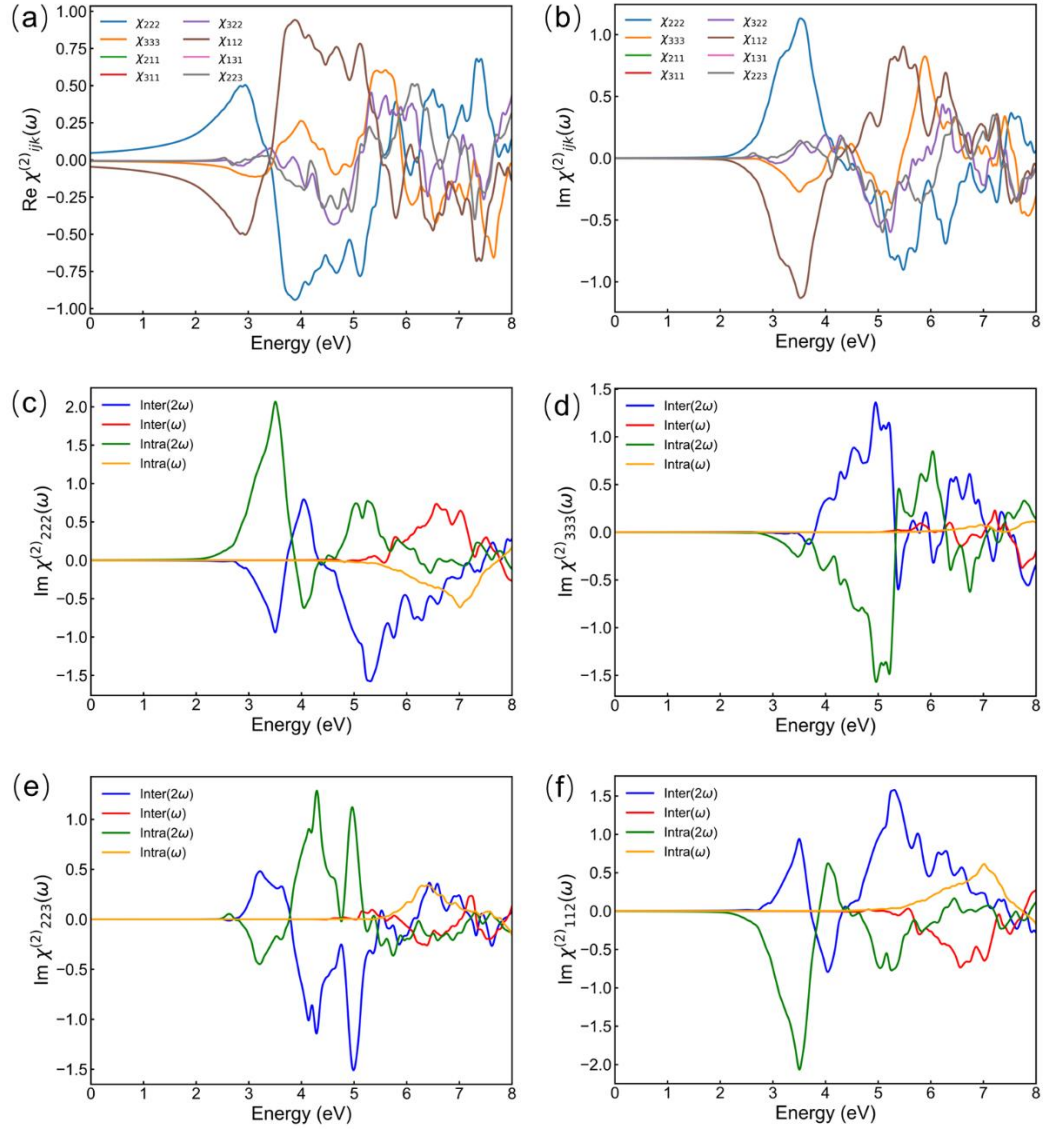

Figure S5. Calculated (a) real and (b) imaginary parts of  $\chi_{ijk}^{(2)}(\omega)$ . Calculated (c)  $\text{Im } \chi_{222}^{(2)}(\omega)$ , (d)  $\text{Im } \chi_{333}^{(2)}(\omega)$ , (e)  $\text{Im } \chi_{223}^{(2)}(\omega)$ , (f)  $\text{Im } \chi_{112}^{(2)}(\omega)$  spectra along with the intraband and interband contributions. All  $\text{Im } \chi_{ijk}^{(2)}(\omega)$  are given in units of  $10^{-7}$  esu.

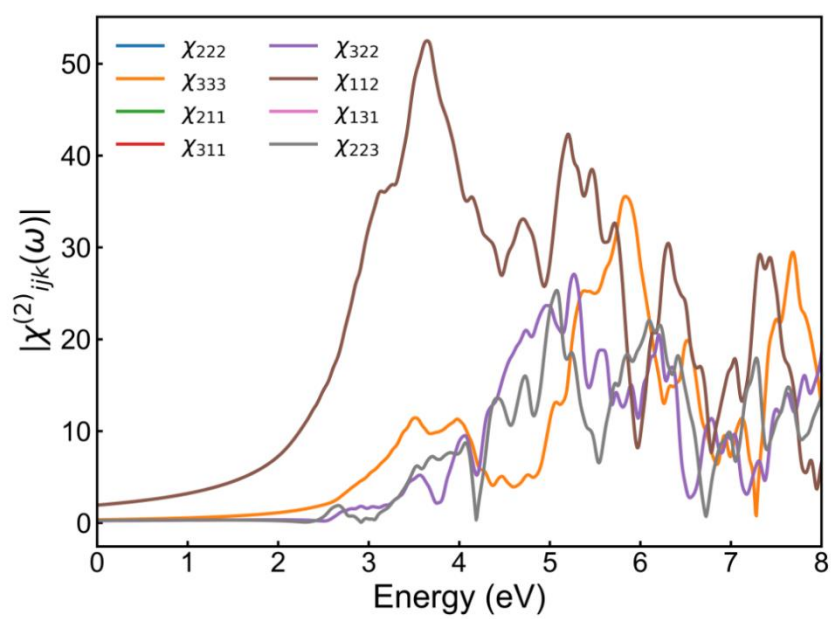

Figure S6. Calculated absolute values of  $\chi_{ijk}^{(2)}(\omega)$ . All  $|\chi_{ijk}^{(2)}(\omega)|$  are expressed in units of pm/V.

## Supplementary Tables

Table S1. Crystal structural information and bond valence sum (BVS) for predicted structures.

| Phase                              | Pearson symbol       | Space group & cell (Å)                                                                                                 | Atom | Wyckoff position | x(a)   | y(b)   | z(c)   | $\Delta E$ (eV/f.u.) | BVS   |
|------------------------------------|----------------------|------------------------------------------------------------------------------------------------------------------------|------|------------------|--------|--------|--------|----------------------|-------|
| <b>K<sub>3</sub>BO<sub>3</sub></b> | <b><i>oP56</i></b>   | <b><i>Pbam</i></b><br>a=10.1355,<br>b=10.2473,<br>c=9.6536,<br>$\alpha=\beta=\gamma=90^\circ$                          | K1   | <i>8i</i>        | 0.2530 | 0.2628 | 0.2498 | -1.4804              | 0.864 |
|                                    |                      |                                                                                                                        | K2   | <i>4g</i>        | 0.3432 | 0.4816 | 0.0000 |                      | 0.998 |
|                                    |                      |                                                                                                                        | K3   | <i>4h</i>        | 0.4792 | 0.1619 | 0.5000 |                      | 0.974 |
|                                    |                      |                                                                                                                        | K4   | <i>4f</i>        | 0.5000 | 0.0000 | 0.1849 |                      | 1.006 |
|                                    |                      |                                                                                                                        | K5   | <i>4e</i>        | 0.5000 | 0.5000 | 0.3157 |                      | 1.060 |
|                                    |                      |                                                                                                                        | B1   | <i>4h</i>        | 0.2483 | 0.4660 | 0.5000 |                      | 2.733 |
|                                    |                      |                                                                                                                        | B2   | <i>4g</i>        | 0.4558 | 0.7486 | 0.0000 |                      | 2.736 |
|                                    |                      |                                                                                                                        | O1   | <i>8i</i>        | 0.3037 | 0.0101 | 0.3730 |                      | 1.774 |
|                                    |                      |                                                                                                                        | O2   | <i>4h</i>        | 0.3491 | 0.3727 | 0.5000 |                      | 2.013 |
| <b>K<sub>3</sub>BO<sub>3</sub></b> | <b><i>hR21</i></b>   | <b><i>R3m</i></b><br>a=b=10.7671, c=3.935,<br>$\alpha=\beta=90^\circ, \gamma=120^\circ$                                | K1   | <i>9b</i>        | 0.8799 | 0.1201 | 0.5327 | -1.4800              | 0.945 |
|                                    |                      |                                                                                                                        | B1   | <i>3a</i>        | 0.0000 | 0.0000 | 0.0364 |                      | 2.733 |
|                                    |                      |                                                                                                                        | O1   | <i>9b</i>        | 0.0754 | 0.1507 | 0.0373 |                      | 1.856 |
|                                    |                      |                                                                                                                        |      |                  |        |        |        |                      |       |
| <b>K<sub>3</sub>BO<sub>3</sub></b> | <b><i>mP28-1</i></b> | <b><i>P2<sub>1</sub>/c</i></b><br>a=6.1891, b=7.0517,<br>c=12.2249, $\alpha=\gamma=90^\circ$ ,<br>$\beta=111.69^\circ$ | K1   | <i>4e</i>        | 0.2996 | 0.4982 | 0.1082 | -1.4768              | 1.021 |
|                                    |                      |                                                                                                                        | K2   | <i>4e</i>        | 0.2970 | 0.4989 | 0.5914 |                      | 0.947 |
|                                    |                      |                                                                                                                        | K3   | <i>4e</i>        | 0.1372 | 0.6643 | 0.8177 |                      | 0.902 |
|                                    |                      |                                                                                                                        | B1   | <i>4e</i>        | 0.2909 | 0.2333 | 0.3945 |                      | 2.718 |
|                                    |                      |                                                                                                                        | O1   | <i>4e</i>        | 0.5070 | 0.7536 | 0.5048 |                      | 2.057 |
|                                    |                      |                                                                                                                        | O2   | <i>4e</i>        | 0.0716 | 0.2254 | 0.4055 |                      | 1.765 |
|                                    |                      |                                                                                                                        | O3   | <i>4e</i>        | 0.3063 | 0.2799 | 0.7823 |                      | 1.762 |
| <b>K<sub>3</sub>BO<sub>3</sub></b> | <b><i>mP28-2</i></b> | <b><i>P2<sub>1</sub>/c</i></b><br>a=6.3963, b=9.1951,<br>c=10.3901, $\alpha=\gamma=90^\circ$ ,<br>$\beta=127.28^\circ$ | K1   | <i>4e</i>        | 0.8607 | 0.1090 | 0.5600 | -1.4592              | 0.744 |
|                                    |                      |                                                                                                                        | K2   | <i>4e</i>        | 0.7995 | 0.5047 | 0.5470 |                      | 1.016 |
|                                    |                      |                                                                                                                        | K3   | <i>4e</i>        | 0.4518 | 0.7801 | 0.2984 |                      | 1.026 |
|                                    |                      |                                                                                                                        | B1   | <i>4e</i>        | 0.2638 | 0.3235 | 0.8446 |                      | 2.726 |
|                                    |                      |                                                                                                                        | O1   | <i>4e</i>        | 0.6990 | 0.5621 | 0.2293 |                      | 1.785 |
|                                    |                      |                                                                                                                        | O2   | <i>4e</i>        | 0.4415 | 0.2063 | 0.9105 |                      | 2.060 |
|                                    |                      |                                                                                                                        | O3   | <i>4e</i>        | 0.9447 | 0.8254 | 0.6441 |                      | 1.667 |
| <b>K<sub>3</sub>BO<sub>3</sub></b> | <b><i>hP14</i></b>   | <b><i>P6<sub>3</sub>/m</i></b><br>a=b=9.8507, c=4.0335,<br>$\alpha=\beta=90^\circ, \gamma=120^\circ$                   | K1   | <i>6h</i>        | 0.6696 | 0.1110 | 0.7500 | -1.4464              | 0.939 |
|                                    |                      |                                                                                                                        | B1   | <i>2d</i>        | 0.3333 | 0.6667 | 0.7500 |                      | 2.748 |
|                                    |                      |                                                                                                                        | O1   | <i>6h</i>        | 0.3304 | 0.5227 | 0.7500 |                      | 1.855 |
| <b>K<sub>3</sub>BO<sub>3</sub></b> | <b><i>mP28-3</i></b> | <b><i>P2<sub>1</sub>/c</i></b><br>a=9.0306, b=5.3518,<br>c=10.5727, $\alpha=\gamma=90^\circ$ ,<br>$\beta=109.03^\circ$ | K1   | <i>4e</i>        | 0.4939 | 0.7925 | 0.6044 | -1.4449              | 0.996 |
|                                    |                      |                                                                                                                        | K2   | <i>4e</i>        | 0.7565 | 0.8874 | 0.9068 |                      | 0.796 |
|                                    |                      |                                                                                                                        | K3   | <i>4e</i>        | 0.0875 | 0.5506 | 0.8608 |                      | 0.794 |
|                                    |                      |                                                                                                                        | B1   | <i>4e</i>        | 0.2673 | 0.9140 | 0.7595 |                      | 2.731 |
|                                    |                      |                                                                                                                        | O1   | <i>4e</i>        | 0.3977 | 0.7692 | 0.8296 |                      | 1.751 |
|                                    |                      |                                                                                                                        | O2   | <i>4e</i>        | 0.1942 | 0.8773 | 0.6214 |                      | 1.891 |
|                                    |                      |                                                                                                                        | O3   | <i>4e</i>        | 0.2085 | 0.4000 | 0.3245 |                      | 1.817 |
|                                    |                      | <b><i>P2<sub>1</sub>/c</i></b><br>a=8.6535, b=5.3321,                                                                  | K1   | <i>4e</i>        | 0.2555 | 0.6200 | 0.4845 |                      | 0.831 |
|                                    |                      |                                                                                                                        | K2   | <i>4e</i>        | 0.0194 | 0.2749 | 0.8524 |                      | 0.949 |
|                                    |                      |                                                                                                                        | K3   | <i>4e</i>        | 0.4111 | 0.4697 | 0.8188 |                      | 0.924 |

|                                                |                      |                                                                     |                                    |                      |                                                                    |        |        |         |        |
|------------------------------------------------|----------------------|---------------------------------------------------------------------|------------------------------------|----------------------|--------------------------------------------------------------------|--------|--------|---------|--------|
| <b>K<sub>3</sub>BO<sub>3</sub></b>             | <b><i>mP28-4</i></b> | c=10.7458,<br>α=90°, β=103.47°,<br>γ=90°                            | B1                                 | 4e                   | 0.2330                                                             | 0.1194 | 0.6277 | -1.4381 | 2.729  |
|                                                |                      |                                                                     | O1                                 | 4e                   | 0.2847                                                             | 0.9494 | 0.7293 |         | 1.703  |
|                                                |                      |                                                                     | O2                                 | 4e                   | 0.1052                                                             | 0.2826 | 0.6259 |         | 1.676  |
|                                                |                      |                                                                     | O3                                 | 4e                   | 0.3102                                                             | 0.3757 | 0.0263 |         | 1.941  |
| <b>K<sub>3</sub>BO<sub>3</sub></b>             | <b><i>aP14</i></b>   | a=5.4682, b=6.3878,<br>c=7.1551, α=99.06°,<br>β=99.27°, γ=101.20°   | K1                                 | 2i                   | 0.2960                                                             | 0.3695 | 0.2434 |         | 0.818  |
|                                                |                      |                                                                     | K2                                 | 2i                   | 0.2415                                                             | 0.8082 | 0.0680 |         | 1.004  |
|                                                |                      |                                                                     | K3                                 | 2i                   | 0.2104                                                             | 0.8074 | 0.5565 |         | 0.910  |
|                                                |                      |                                                                     | B1                                 | 2i                   | 0.2467                                                             | 0.2801 | 0.7486 | -1.4320 | 2.731  |
|                                                |                      |                                                                     | O1                                 | 2i                   | 0.7768                                                             | 0.8719 | 0.1295 |         | 1.646  |
|                                                |                      |                                                                     | O2                                 | 2i                   | 0.1370                                                             | 0.4615 | 0.7742 |         | 1.757  |
|                                                |                      |                                                                     | O3                                 | 2i                   | 0.3791                                                             | 0.2469 | 0.5972 |         | 1.807  |
|                                                |                      |                                                                     | <b>K<sub>3</sub>BO<sub>3</sub></b> | <b><i>aP28-1</i></b> | a=6.3446, b=7.2240,<br>c=11.2510, α=94.22°,<br>β=104.94°, γ=93.75° | K1     | 2i     | 0.6977  | 0.9459 |
| K2                                             | 2i                   | 0.6935                                                              |                                    |                      |                                                                    | 0.4846 | 0.3767 |         | 1.082  |
| K3                                             | 2i                   | 0.7106                                                              |                                    |                      |                                                                    | 0.9919 | 0.3983 |         | 0.869  |
| K4                                             | 2i                   | 0.6921                                                              |                                    |                      |                                                                    | 0.4491 | 0.9098 |         | 0.791  |
| K5                                             | 2i                   | 0.8874                                                              |                                    |                      |                                                                    | 0.2013 | 0.1743 |         | 0.925  |
| K6                                             | 2i                   | 0.8426                                                              |                                    |                      |                                                                    | 0.3391 | 0.6609 |         | 0.770  |
| B1                                             | 2i                   | 0.7172                                                              |                                    |                      |                                                                    | 0.7313 | 0.6033 |         | 2.712  |
| B2                                             | 2i                   | 0.2056                                                              |                                    |                      |                                                                    | 0.2617 | 0.8651 | -1.4239 | 2.737  |
| O1                                             | 2i                   | 0.4746                                                              |                                    |                      |                                                                    | 0.2466 | 0.4877 |         | 2.014  |
| O2                                             | 2i                   | 0.7039                                                              |                                    |                      |                                                                    | 0.6850 | 0.7207 |         | 1.960  |
| O3                                             | 2i                   | 0.0142                                                              |                                    |                      |                                                                    | 0.1957 | 0.8955 |         | 1.673  |
| O4                                             | 2i                   | 0.3669                                                              |                                    |                      |                                                                    | 0.1403 | 0.8577 |         | 1.778  |
| O5                                             | 2i                   | 0.9224                                                              |                                    |                      |                                                                    | 0.7746 | 0.5751 |         | 1.649  |
| O6                                             | 2i                   | 0.2349                                                              |                                    |                      |                                                                    | 0.4491 | 0.8431 |         | 2.023  |
| <b>K<sub>3</sub>BO<sub>3</sub></b>             | <b><i>aP28-2</i></b> | a=6.7031, b=8.5088,<br>c=8.8861,<br>α=87.80°, β=88.11°,<br>γ=87.64° | K1                                 | 2i                   | 0.6344                                                             | 0.3588 | 0.4291 |         | 0.762  |
|                                                |                      |                                                                     | K2                                 | 2i                   | 0.8804                                                             | 0.0757 | 0.8432 |         | 0.825  |
|                                                |                      |                                                                     | K3                                 | 2i                   | 0.7664                                                             | 0.4468 | 0.0154 |         | 0.982  |
|                                                |                      |                                                                     | K4                                 | 2i                   | 0.7468                                                             | 0.9873 | 0.4633 |         | 1.051  |
|                                                |                      |                                                                     | K5                                 | 2i                   | 0.8612                                                             | 0.6765 | 0.6976 |         | 0.904  |
|                                                |                      |                                                                     | K6                                 | 2i                   | 0.6156                                                             | 0.8049 | 0.1546 |         | 0.940  |
|                                                |                      |                                                                     | B1                                 | 2i                   | 0.5490                                                             | 0.1612 | 0.1744 |         | 2.720  |
|                                                |                      |                                                                     | B2                                 | 2i                   | 0.9194                                                             | 0.6771 | 0.3548 | -1.4206 | 2.723  |
|                                                |                      |                                                                     | O1                                 | 2i                   | 0.5404                                                             | 0.6992 | 0.8863 |         | 1.925  |
|                                                |                      |                                                                     | O2                                 | 2i                   | 0.4354                                                             | 0.0639 | 0.2719 |         | 1.881  |
|                                                |                      |                                                                     | O3                                 | 2i                   | 0.9719                                                             | 0.6187 | 0.2127 |         | 1.764  |
|                                                |                      |                                                                     | O4                                 | 2i                   | 0.9483                                                             | 0.2305 | 0.5704 |         | 1.915  |
|                                                |                      |                                                                     | O5                                 | 2i                   | 0.7521                                                             | 0.1204 | 0.1423 |         | 1.503  |
|                                                |                      |                                                                     | O6                                 | 2i                   | 0.7261                                                             | 0.6565 | 0.4178 |         | 1.919  |
| <b>K<sub>3</sub>BO<sub>3</sub></b>             | <b><i>mP28-5</i></b> | a=5.5350, b=14.3019,<br>c=7.2498, α=γ=90°,<br>β=124.27°             | K1                                 | 4e                   | 0.4953                                                             | 0.2791 | 0.8542 |         | 0.999  |
|                                                |                      |                                                                     | K2                                 | 4e                   | 0.5766                                                             | 0.9751 | 0.2887 |         | 0.966  |
|                                                |                      |                                                                     | K3                                 | 4e                   | 0.9456                                                             | 0.8768 | 0.1147 |         | 0.745  |
|                                                |                      |                                                                     | B1                                 | 4e                   | 0.0504                                                             | 0.8760 | 0.7172 | -1.4142 | 2.720  |
|                                                |                      |                                                                     | O1                                 | 4e                   | 0.3470                                                             | 0.6290 | 0.3949 |         | 1.913  |
|                                                |                      |                                                                     | O2                                 | 4e                   | 0.0620                                                             | 0.3198 | 0.9741 |         | 1.667  |
| <b>K<sub>4</sub>B<sub>2</sub>O<sub>5</sub></b> | <b><i>mC44</i></b>   | a=11.7267, b=9.1359,<br>c=6.9802, α=γ=90°                           | O3                                 | 4e                   | 0.8654                                                             | 0.5603 | 0.2283 |         | 1.850  |
|                                                |                      |                                                                     | K1                                 | 8f                   | 0.8595                                                             | 0.5397 | 0.0770 |         | 0.967  |
|                                                |                      |                                                                     | K2                                 | 8f                   | 0.8611                                                             | 0.8364 | 0.7341 |         | 0.891  |
|                                                |                      |                                                                     | B1                                 | 8f                   | 0.0874                                                             | 0.1790 | 0.6728 | -1.5636 | 2.772  |
|                                                |                      |                                                                     | O1                                 | 8f                   | 0.0521                                                             | 0.6985 | 0.0528 |         | 1.833  |

|                                                |             |                                                                                                                      |        |        |        |        |        |         |       |
|------------------------------------------------|-------------|----------------------------------------------------------------------------------------------------------------------|--------|--------|--------|--------|--------|---------|-------|
|                                                |             | $\beta=109.38^\circ$                                                                                                 | O2     | 4e     | 0.0000 | 0.8913 | 0.2500 |         | 1.804 |
|                                                |             |                                                                                                                      | O3     | 8f     | 0.6993 | 0.3849 | 0.2191 |         | 1.895 |
| <b>K<sub>4</sub>B<sub>2</sub>O<sub>5</sub></b> | <b>aP22</b> | $\bar{P1}$<br>a=5.5174, b=7.5099,<br>c=10.3114, $\alpha=70.62^\circ$ ,<br>$\beta=75.21^\circ$ , $\gamma=77.19^\circ$ | K1     | 2i     | 0.2945 | 0.9668 | 0.1496 |         | 0.951 |
|                                                |             |                                                                                                                      | K2     | 2i     | 0.7144 | 0.1546 | 0.4692 |         | 1.042 |
|                                                |             |                                                                                                                      | K3     | 2i     | 0.7410 | 0.3082 | 0.0718 |         | 0.886 |
|                                                |             |                                                                                                                      | K4     | 2i     | 0.1831 | 0.4673 | 0.3430 |         | 0.814 |
|                                                |             |                                                                                                                      | B1     | 2i     | 0.7419 | 0.6458 | 0.1642 |         | 2.773 |
|                                                |             |                                                                                                                      | B2     | 2i     | 0.8006 | 0.8599 | 0.3000 | -1.5087 | 2.767 |
|                                                |             |                                                                                                                      | O1     | 2i     | 0.4043 | 0.9997 | 0.7060 |         | 1.940 |
|                                                |             |                                                                                                                      | O2     | 2i     | 0.2939 | 0.5163 | 0.7276 |         | 1.765 |
|                                                |             |                                                                                                                      | O3     | 2i     | 0.1161 | 0.2209 | 0.8196 |         | 1.885 |
|                                                |             |                                                                                                                      | O4     | 2i     | 0.0508 | 0.2001 | 0.6002 |         | 1.845 |
|                                                |             |                                                                                                                      | O5     | 2i     | 0.3367 | 0.3064 | 0.9611 |         | 1.666 |
| <b>K<sub>2</sub>B<sub>4</sub>O<sub>7</sub></b> | <b>aP52</b> | $\bar{P1}$<br>a=6.9441, b=8.8709,<br>c=11.6204, $\alpha=94.71^\circ$ ,<br>$\beta=94.87^\circ$ , $\gamma=92.33^\circ$ | K1     | 2i     | 0.6343 | 0.0524 | 0.1429 |         | 1.038 |
|                                                |             |                                                                                                                      | K2     | 2i     | 0.4913 | 0.5214 | 0.7793 |         | 0.992 |
|                                                |             |                                                                                                                      | K3     | 2i     | 0.8316 | 0.6704 | 0.9827 |         | 0.912 |
|                                                |             |                                                                                                                      | K4     | 2i     | 0.8582 | 0.8544 | 0.3985 |         | 1.154 |
|                                                |             |                                                                                                                      | B1     | 2i     | 0.6782 | 0.2578 | 0.5784 |         | 2.924 |
|                                                |             |                                                                                                                      | B2     | 2i     | 0.5651 | 0.7957 | 0.5870 |         | 2.930 |
|                                                |             |                                                                                                                      | B3     | 2i     | 0.9739 | 0.4517 | 0.2854 |         | 2.929 |
|                                                |             |                                                                                                                      | B4     | 2i     | 0.8436 | 0.0502 | 0.8447 |         | 2.921 |
|                                                |             |                                                                                                                      | B5     | 2i     | 0.8739 | 0.3071 | 0.7839 |         | 3.135 |
|                                                |             |                                                                                                                      | B6     | 2i     | 0.7891 | 0.2534 | 0.3773 |         | 2.944 |
|                                                |             |                                                                                                                      | B7     | 2i     | 0.9012 | 0.8084 | 0.7158 |         | 2.912 |
|                                                |             |                                                                                                                      | B8     | 2i     | 0.6784 | 0.2622 | 0.9484 |         | 2.847 |
|                                                |             |                                                                                                                      | O1     | 2i     | 0.9068 | 0.1479 | 0.3156 | -1.4211 | 1.948 |
|                                                |             |                                                                                                                      | O2     | 2i     | 0.8223 | 0.2487 | 0.5058 |         | 1.977 |
|                                                |             |                                                                                                                      | O3     | 2i     | 0.1761 | 0.5898 | 0.6526 |         | 1.996 |
|                                                |             |                                                                                                                      | O4     | 2i     | 0.4225 | 0.7890 | 0.6613 |         | 2.051 |
|                                                |             |                                                                                                                      | O5     | 2i     | 0.2956 | 0.7104 | 0.3040 |         | 1.934 |
| O6                                             | 2i          | 0.0429                                                                                                               | 0.8448 | 0.2030 |        | 1.977  |        |         |       |
| O7                                             | 2i          | 0.2032                                                                                                               | 0.6364 | 0.1048 |        | 2.035  |        |         |       |
| O8                                             | 2i          | 0.0320                                                                                                               | 0.4048 | 0.7540 |        | 1.862  |        |         |       |
| O9                                             | 2i          | 0.4842                                                                                                               | 0.2327 | 0.5335 |        | 2.039  |        |         |       |
| O10                                            | 2i          | 0.2891                                                                                                               | 0.8972 | 0.0779 |        | 2.101  |        |         |       |
| O11                                            | 2i          | 0.4532                                                                                                               | 0.7000 | 0.9800 |        | 1.753  |        |         |       |
| O12                                            | 2i          | 0.8854                                                                                                               | 0.6463 | 0.7441 |        | 1.931  |        |         |       |
| O13                                            | 2i          | 0.7555                                                                                                               | 0.8318 | 0.6182 |        | 1.951  |        |         |       |
| O14                                            | 2i          | 0.8536                                                                                                               | 0.8976 | 0.8250 |        | 1.868  |        |         |       |

## References

- 1 Krogh-Moe J. The crystal structure of the high-temperature modification of potassium pentaborate[J]. Acta Crystallographica Section B: Structural Crystallography and Crystal Chemistry, 1972, 28(1): 168-172.
- 2 Bubnova R S, Fundamenskii V S, Filatov S K, et al. Crystal structure and thermal behavior of  $\text{KB}_3\text{O}_5$ [C]. Doklady Physical Chemistry. New York: Consultants Bureau., 2004, 398(4-6): 249-253.
- 3 Neumair S C, Vanicek S, Kaindl R, et al. HP- $\text{KB}_3\text{O}_5$  Highlights the Structural Diversity of Borates: Corner-Sharing  $\text{BO}_3/\text{BO}_4$  Groups in Combination with Edge-Sharing  $\text{BO}_4$  Tetrahedra[J]. 2011.
- 4 Rashkeev S N, Lambrecht W R L, Segall B. Efficient ab initio method for the calculation of frequency-dependent second-order optical response in semiconductors[J]. Physical Review B, 1998, 57(7): 3905.
- 5 Hu C L, Xu X, Sun C F, et al. Electronic structures and optical properties of  $\text{Ca}_5(\text{BO}_3)_3\text{F}$ : a systematical first-principles study[J]. Journal of Physics: Condensed Matter, 2011, 23(39): 395501.
